# Supplementary material for: A novel ion imprinted SiO2 microsphere for the specific and rapid extraction and pre-concentration of ultra-trace methyl mercury
Source: Royal Society of Chemistry journal article supplement (doi:10.1039/c6ra05973b), 2016-01-01
Supplement: c6ra05973b1.pdf [file c6ra05973b1.pdf]

**Electronic supplementary information for**

**A novel ion imprinted SiO<sub>2</sub> microsphere for the specific and rapid extraction and  
pre-concentration of ultra-trace methyl mercury**

Wenjing Jiang,<sup>ab</sup> Zhiqiang Chen,<sup>a</sup> Xian Cheng,<sup>a</sup> Weihua Wu,<sup>a</sup> Yongning Wu,<sup>c</sup> Liangjun  
Xu,<sup>a</sup> FengFu Fu<sup>a\*</sup>

<sup>a</sup>Key Lab of Analysis and Detection for Food Safety of Ministry of Education, Fujian  
Provincial Key Lab of Analysis and Detection for Food Safety, College of Chemistry,  
Fuzhou University, Fuzhou, Fujian, 350116, China

<sup>b</sup>College of Life Sciences, Fujian Agriculture and Forest University, Fuzhou, Fujian, P.  
R. China.

<sup>c</sup>China National Center for Food Safety Risk Assessment, Beijing 100022, China.

## 1. Reagents and Chemicals

Ultrapure water (18.2 M $\Omega$ /cm) obtained from a Milli-Q purification device (Millipore, USA) was used in the total experiment. Methacrylic acid (MAA), azodiisobutyronitrile (AIBN), trimethylolpropane trimethacrylate (TMPTM), 1-Pyrrolidinedicarbodithioic acid (PDC), methylmercury chloride (CH<sub>3</sub>HgCl), ethylmercury chloride (CH<sub>3</sub>CH<sub>2</sub>HgCl), methacryloxypropyltrimethoxyl silane ( $\gamma$ -MAPS), and thiourea were purchased from J&K Technology (Guangzhou, China). Nitric acid, hydrochloric acid, methanol, and ethanol were supplied by Sinopharm Chemical Reagent (Shanghai, China). Lead nitrate Pb(NO<sub>3</sub>)<sub>2</sub>, cadmium chloride, mercury chloride (HgCl<sub>2</sub>) were obtained from Xilong Chemical (Guangzhou, China). The silica microspheres (2.0  $\mu$ m) were purchased from Alfa Aesar Company (Tianjin, China).

A Tecnai F30 Field Emission Gun Transmission Electron Microscope (TEM, Philips-FEI, Netherlands) was used for TEM characterization. Fourier transform infrared (FT-IR) spectra were recorded by a Nicolet 6700 infrared spectrometer (Thermo Fisher, USA), and a Esca Lab 250 X-ray photoelectron spectroscopy (XPS, Thermo Fisher Scientific Company, US) was used for XPS characterization.

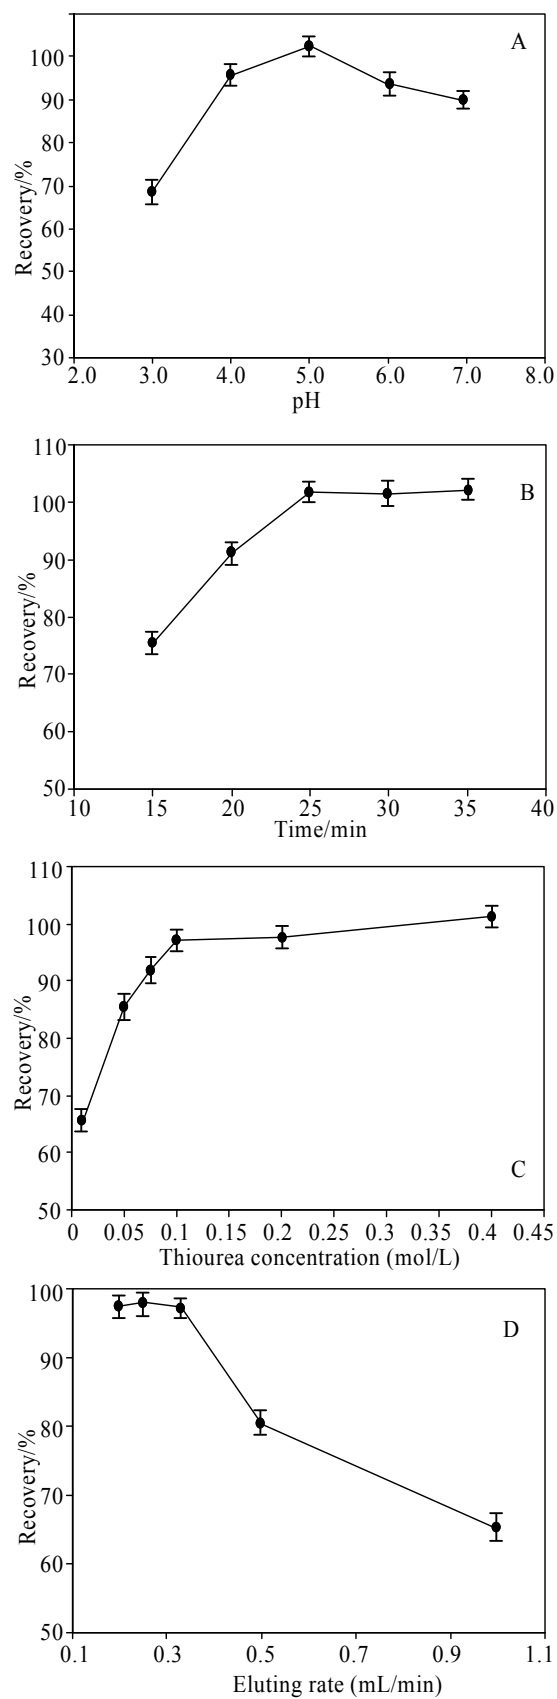

**Figure S1:** A: The effect of sample's pH on the pre-concentration/extraction of MeHg. Other conditions: MeHg IISM 30 mg, water sample 500 mL. B: The effect of stirring time on the pre-concentration/extraction of MeHg. Other conditions: MeHg IISM is

30 mg, water sample 500 mL, pH 5.0. C: The effect of thiourea concentration on the eluting of MeHg adsorbed on MeHg IISM. D: The effect of eluting rate on the eluting efficiency of MeHg, when 2 mL eluent was used to elute MeHg adsorbed on MeHg IISM.

Table S1: Running parameters of ICP-MS

| Parameter                             | Value                                 |
|---------------------------------------|---------------------------------------|
| RF power                              | 1400 W                                |
| Cool gas flow                         | 15 L/min                              |
| Auxiliary gas flow                    | 0.90 L/min                            |
| Nebulizer gas flow                    | 0.80 L/min                            |
| Makeup gas rate                       | 0.20 L/min                            |
| Torch                                 | Non-shield torch                      |
| Cones                                 | Nickel                                |
| Dwell times                           | 10 ms                                 |
| Resolution                            | Standard                              |
| Oxide(CeO/Ce)                         | ≤2.0%                                 |
| Doubly Charged (Ce <sup>2+</sup> /Ce) | ≤2.0%                                 |
| Monitored isotope(m/z)                | <sup>201</sup> Hg, <sup>202</sup> Hg  |
| Nebulizer type                        | MCN (optimum flow is 50 - 200 μL/min) |

Table 2S: Comparison of performance characteristics of different pre-concentration procedure

| Reference                       | Loading Capacity | Pre-concentration Factor | Sample Consumption                           | Extraction Time                       | Reusability |
|---------------------------------|------------------|--------------------------|----------------------------------------------|---------------------------------------|-------------|
| This work                       | 30 mg/g          | 250                      | 30mg for 500mL water sample                  | Adsorbtion 25min;<br>Desorption 15min | 50          |
| Anal. Chim. Acta 575 (2006) 159 | 170 $\mu$ mol/g  | no provided              | 20mg for 50mL solution                       | Adsorbtion 2h;<br>Desorption 2h       | 20          |
| J. Chromatogr. A 1391 (2015) 9  | no provided      | 50                       | 200mg for 200mL sea water sample             | 100min                                | no provided |
| Talanta 144 (2015) 636          | 20 $\mu$ g/g     | no provided              | 150mg for 0.2g The reference materials(fish) | no provided                           | 5~10        |
| Talanta 71 (2007) 699           | 92.4 mg/g        | 20                       | 20mg for 50mL solution                       | Adsorbtion 50min;<br>Desorption 2h    | 10          |
